# Supplementary material for: SAGA Complex Subunit Hfi1 Is Important in the Stress Response and Pathogenesis of Cryptococcus neoformans
Source: MDPI journal article supplement (doi:10.3390/jof9121198), 2023-12-15
Supplement: s1 [file s1]

## **Supplementary materials**

**Table S1: Strains used in this study.**

| Strain | Function                    | Species              | Gene        | Background | Selective marker | Source                        |
|--------|-----------------------------|----------------------|-------------|------------|------------------|-------------------------------|
| H99O   | Wild-type                   | <i>C. neoformans</i> |             | Clinical   |                  | (Janbon <i>et al.</i> , 2014) |
| CJS24  | <i>hfi1</i> Δ               | <i>C. neoformans</i> | <i>HFI1</i> | H99O       | <i>NEO</i>       | This study                    |
| KY06   | <i>HFI1</i> complementation | <i>C. neoformans</i> | <i>HFI1</i> | CJS24      | <i>NAT</i>       | This study                    |
| Mach1  | Cloning                     | <i>E. coli</i>       |             | Mach1      | <i>bla</i>       | Thermo Scientific             |

**Table S2: Primers used in this study.**

| Fragment / Gene                                      | ID     | Sequence                                             |
|------------------------------------------------------|--------|------------------------------------------------------|
| <i>HFI1</i> – 5' flanking region                     | UQ5699 | 5' – CTATAGGGCGAATTGGGTACCCCTTTGCTAACTGCCGTGCTGA –3' |
|                                                      | UQ5700 | 5' – TCCAGCTCACATCCTCGCAGCTAGAAGTGTGGAAAAAGGCCG –3'  |
| <i>HFI1</i> – 3' flanking region                     | UQ5702 | 5' – CCGTGTTAATACAGATAAACCGGAGGTGTTTGGTTGGTGTAG –3'  |
|                                                      | UQ5704 | 5' – CCGCTCTAGAACTAGTGGATCACCTCTGGAGATGGAGATAGG –3'  |
| <i>HFI1</i> H99O gene overhang with pSDMA25          | UQ5999 | 5' – GGGTACCGGGCCCCCCTCGACTTTGCTAACTGCCGTGCTGA –3'   |
|                                                      | UQ6000 | 5' – GTGGCGGCCGCTCTAGAACTAGACCTCTGGAGATGGAGATAGG –3' |
| <i>HFI1</i> – <i>NEO</i> deletion plasmid sequencing | UQ6001 | 5' – GAGCATCGATGTCCTTCAAAC –3'                       |
|                                                      | UQ6002 | 5' – CTTCCAACCTACATCAAATAG –3'                       |
|                                                      | UQ6003 | 5' – CAGCAGCAGCGGAAAAGGATAT –3'                      |
|                                                      | UQ6004 | 5' – TCCACAGGCTAATGACAGCAC –3'                       |
|                                                      | UQ6005 | 5' – GTACGGTTATAATCTCACAGC –3'                       |
| <i>HFI1</i> in pSDMA25 sequencing                    | UQ6001 | 5' – GAGCATCGATGTCCTTCAAAC –3'                       |
|                                                      | UQ6003 | 5' – CAGCAGCAGCGGAAAAGGATAT –3'                      |
|                                                      | UQ5746 | 5' – AAATATTAACGCTTACAATTT –3'                       |
|                                                      | UQ5747 | 5' – CGACTGGAAAGCGGGCAGTGA –3'                       |
|                                                      | UQ6002 | 5' – CTTCCAACCTACATCAAATAG –3'                       |
|                                                      | UQ6004 | 5' – TCCACAGGCTAATGACAGCAC –3'                       |
|                                                      | UQ6005 | 5' – GTACGGTTATAATCTCACAGC –3'                       |
| <i>HFI1</i> RT-PCR                                   | UQ6258 | 5' – GTTAAAAGGCGATCATTTACACC –3'                     |
|                                                      | UQ6259 | 5' – CGTTGTTGGAGGGAGGA –3'                           |
| <i>ADA2</i> RT-PCR                                   | UQ6260 | 5' – CAGAGTATCGGGCTATACAAGC –3'                      |
|                                                      | UQ6261 | 5' – CTTCCGCGAGTTTGCAACTTT –3'                       |
| <i>NGG1</i> RT-PCR                                   | UQ6300 | 5' – AGTGGATGTGGTTGATTTGG –3'                        |
|                                                      | UQ6301 | 5' – TTATTCGGGTCAAACCTCTTCG –3'                      |
| <i>CHD1</i> RT-PCR                                   | UQ6262 | 5' – CTTGCCGATGAAATGGGTCTC –3'                       |
|                                                      | UQ6263 | 5' – GAGGGACAACAACAAGGAAAGG –3'                      |
| <i>GCN5</i> RT-PCR                                   | UQ6264 | 5' – CCGAACAAATCAAGGGTTACG –3'                       |
|                                                      | UQ6265 | 5' – TGTCCGCATAAGTCAGAAAGA –3'                       |
| <i>SGF11</i> RT-PCR                                  | UQ6202 | 5' – ATCAACTGGTGTGGGTAGTG –3'                        |
|                                                      | UQ6203 | 5' – ATATCGGTTGGAGGCAATAGG –3'                       |
| <i>SGF29</i> RT-PCR                                  | UQ6266 | 5' – CAAGTGGCGATGATTGGATTC –3'                       |
|                                                      | UQ6267 | 5' – GGGTAGTGTTGTATGTGTTGC –3'                       |
| <i>SGF73</i> RT-PCR                                  | UQ6268 | 5' – CCGGAAATGAAGAGGGAAGG –3'                        |
|                                                      | UQ6269 | 5' – CATGATTACACACCCGTCGAT –3'                       |
| <i>SPT3</i> RT-PCR                                   | UQ6270 | 5' – GGCACAGGCCCAAGTAAA –3'                          |
|                                                      | UQ6271 | 5' – CTCCAAACACAAACATCATCTGC –3'                     |
| <i>SPT7</i> RT-PCR                                   | UQ6302 | 5' – GTAGATCATCTGGATGGGTTGG –3'                      |
|                                                      | UQ6303 | 5' – GGCATGTAGAATGATCTCCTCG –3'                      |
| <i>SPT8</i> RT-PCR                                   | UQ6272 | 5' – GATGGAACCGTCAGAGAATGG –3'                       |
|                                                      | UQ6273 | 5' – GGAAGAGAGTTGGGCTTTGT –3'                        |
| <i>SPT20</i> RT-PCR                                  | UQ6274 | 5' – GATGGTCCAATGAAGCCATTCC –3'                      |
|                                                      | UQ6275 | 5' – GATGGGTGGTTGGATGTCATAAAG –3'                    |
| <i>SUS1</i> RT-PCR                                   | UQ6276 | 5' – GTTGATGTTACGGTCGATGAG –3'                       |
|                                                      | UQ6277 | 5' – AGTAGCTTTTGTATTTCGCTCC –3'                      |

|                       |        |                                        |
|-----------------------|--------|----------------------------------------|
| <i>TAF5</i> RT-PCR    | UQ6278 | 5' - CGATGGTGGATGTCAGTGAA -3'          |
|                       | UQ6279 | 5' - AGATTATCCAGTTCAGCCTTCC -3'        |
| <i>TAF6</i> RT-PCR    | UQ6280 | 5' - CGAGTATTGGGCATTTGGTAGA -3'        |
|                       | UQ6281 | 5' - GGAGGAGTTGATGCATGTATGG -3'        |
| <i>TAF9</i> RT-PCR    | UQ6222 | 5' - GAAGCTCCTCCAAGAGATTACC -3'        |
|                       | UQ6223 | 5' - GTAGACGGACGAGGTCAAATG -3'         |
| <i>TAF10</i> RT-PCR   | UQ6282 | 5' - GGTACAATCGTCAATGTGTCC -3'         |
|                       | UQ6283 | 5' - ATTAGGTGTGTAGGGTTCATCT -3'        |
| <i>TAF12</i> RT-PCR   | UQ6304 | 5' - GGCTTTCGCCCAAAGTACC -3'           |
|                       | UQ6305 | 5' - GGTTCGTGATGTTGGGCGTTATT -3'       |
| <i>TRA1</i> RT-PCR    | UQ6284 | 5' - TTCTTCTGTCTGGGATTCTCG -3'         |
|                       | UQ6285 | 5' - CGCCTTGACGTGTGTAAGATA -3'         |
| <i>UBP8</i> RT-PCR    | UQ6286 | 5' - GACAAGTTGTCTGGTCTGC -3'           |
|                       | UQ6287 | 5' - TGCTTTGAGAAGCGGATTATGG -3'        |
| <i>ACT1</i> RT-PCR    | UQ482  | 5' - CCTACAACTCTATCATGAAGTGTGATCTC -3' |
|                       | UQ728  | 5' - TCTGCATACGGTCGGCAATAC -3'         |
| <i>TUB2</i> RT-PCR    | UQ484  | 5' - AGTCGCTTTTCAAGCGTATCG -3'         |
|                       | UQ729  | 5' - GGATTCGGCTTCAGAGAATTCA -3'        |
| <i>GPD1</i> RT-PCR    | UQ486  | 5' - GTCTCTACTGATTTCGTTGGCACTAC -3'    |
|                       | UQ730  | 5' - GTAACCGTACTCATTGTCCATACCAGCTA -3' |
| <i>HHT1</i> RT-PCR    | UQ488  | 5' - GAAATCCGACGATACCAGAAGTCTAC -3' F  |
|                       | UQ731  | 5' - GGAATCGAAGGTCGGTCTTG -3'          |
| <i>sgf29Δ</i> testing | UQ3574 | 5' - CTGTAGAGCTCCTCGAAATAC -3'         |
|                       | UQ3575 | 5' - CCATACCTAGGCCATCCATAC -3'         |

**Table S3: Plasmids used in this study.**

| Strain        | Function                    | Plasmid backbone  | Marker     | Selective marker | Source                      |
|---------------|-----------------------------|-------------------|------------|------------------|-----------------------------|
| pJAF1         | <i>NEO</i> marker           | pBluescript SK(-) | <i>NEO</i> | <i>bla</i>       | Fraser <i>et al.</i> (2003) |
| pSDMA25       | Safe Haven 1                | pBluescript SK(-) | <i>NAT</i> | <i>bla</i>       | Arras <i>et al.</i> (2015)  |
| <b>pCJS48</b> | <i>hfi1</i> Δ               | pBluescript SK(-) | <i>NEO</i> | <i>bla</i>       | This study                  |
| pKY04         | <i>HF11</i> complementation | pSDMA25           | <i>NAT</i> | <i>bla</i>       | This study                  |

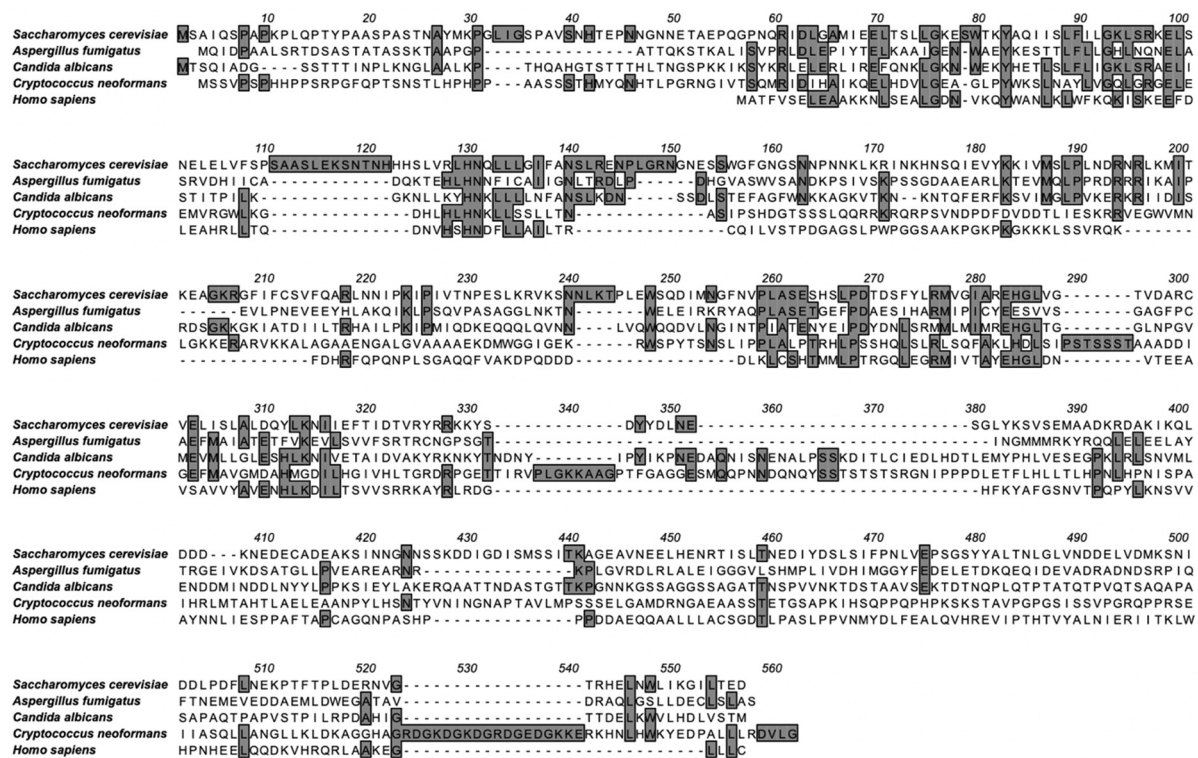

**Figure S1: Protein alignments of Hfi1 from *Saccharomyces cerevisiae*, *Aspergillus fumigatus*, *Candida albicans*, *Cryptococcus neoformans* and *Homo sapiens*.** Numbering for is based on the *C. neoformans* sequence.

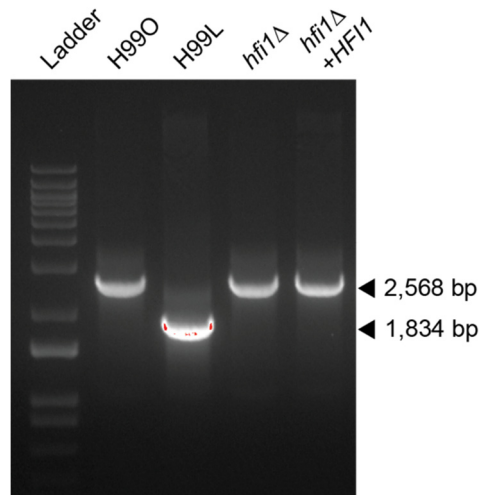

**Figure S2: H99L *sgf29* $\Delta$  allele background verification.** PCR using primers UQ3574 and UQ3575 amplifies a 2568 bp *SGF29* fragment from wild-type (H99O, lane 2) and a 1834 bp band from strains bearing the H99L *sgf29* $\Delta$  allele (H99L, lane 3) easily visible on a 1% agarose TAE gel. Lane 1, Invitrogen 1 Kb Plus DNA Ladder. Lane 3 and Lane 4, a 2568 bp fragment from the mutant and complemented strains.

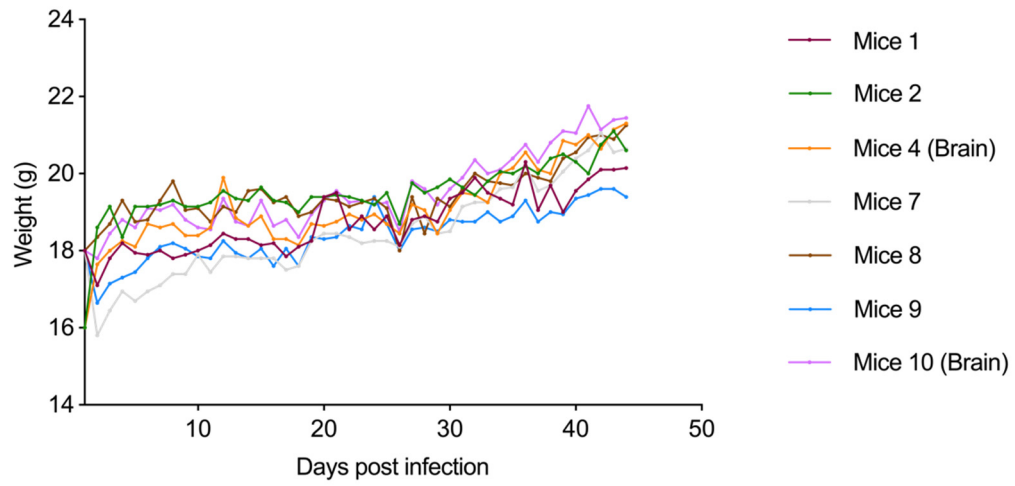

**Figure S3: Changing of weight for seven mice during the experiment.** Mice 1, 2, 7, 8, 9 had colonies identified in the lung. Mice 4 and 10 had colonies identified in both lung and brain.
